# Supplementary material for: Rapid Accumulation of Proline Enhances Salinity Tolerance in Australian Wild Rice Oryza australiensis Domin
Source: MDPI journal article supplement (doi:10.3390/plants10102044), 2021-09-28
Supplement: s1 [file s1]

Article

# Rapid Accumulation of Proline Enhances Salinity Tolerance in Australian Wild Rice *Oryza australiensis* Domin.

Ha Thi Thuy Nguyen <sup>1,\*</sup>, Sudipta Das Bhowmik <sup>1</sup>, Hao Long <sup>1</sup>, Yen Cheng<sup>1</sup>, Sagadevan Mundree <sup>1</sup>, and Linh Thi My Hoang <sup>1,\*</sup>

## Supplementary Materials

**Supplemental Table S1. Plant materials used in this study**

| AGG<br>Accession<br>number | Primary<br>accession<br>name | Taxonomy                            | Origin state    | Latitude | Collection site details                                        |
|----------------------------|------------------------------|-------------------------------------|-----------------|----------|----------------------------------------------------------------|
| 300130                     | JC 2304                      | <i>Oryza australiensis</i><br>Domin | North Territory | -19.9983 | 25.4 km W of QLD/NT border, approx<br>1.5 km W of cattle creek |
|                            | Pokkali                      | <i>Oryza sativa</i> L.              | Queensland      |          | CAB laboratory, QUT                                            |
|                            | Nipponbare                   | <i>Oryza sativa</i> L.              | Queensland      |          | CAB laboratory, QUT                                            |

**Supplemental Table S2. Primers used in this study**

| Gene                             | Forward primer           | Amplicon length (bp) | Ref. |
|----------------------------------|--------------------------|----------------------|------|
| <i>OsP5CS1</i>                   | GATTGGGTGCTGAGGTTGGCATAA | 132                  | [76] |
|                                  | CGACATCCTTGTCACCATTACCA  |                      |      |
| <i>OsP5CS2</i>                   | AAATTGTCGTCTGAGGAGCGT    | 150                  |      |
|                                  | GGTCATCCGAGCAACCAATGA    |                      |      |
| <i>OsP5CR</i>                    | TCCGGGTCAGCTGAAGGATA     | 138                  |      |
|                                  | GAAAGTTCACGGCAACGCTT     |                      |      |
| <i>OsProDH</i>                   | GTGAGCAAGTACCTGCCGTA     | 148                  |      |
|                                  | TTGCAGCCTTGAACCTCCTC     |                      |      |
| <i>OsActin</i>                   | CTGCGGGTATCCATGAGACT     | 118                  | [76] |
|                                  | GCAATGCCAGGGAACATAGT     |                      |      |
| <i>OsEF1-<math>\alpha</math></i> | GCTGGTGACCAAGATCGACA     | 107                  |      |
|                                  | TGGGCTTGGTGGGAATCATC     |                      |      |
